# Supplementary material
Source: MDPI journal article supplement (https://www.mdpi.com/2673-4079/2/3/28)
Supplement: s1 [file s1]

# A Highly Selective Economical Sensor for 4-Nitrophenol

Thuy Le <sup>1</sup>, Noureen Siraj <sup>1,\*</sup>, Yusuf Khan <sup>2</sup>, Nicholas Speller <sup>3</sup>, Mujeebat Bashiru <sup>1</sup>,  
Samantha Macchi <sup>1</sup>, Isiah Warner <sup>4</sup>

<sup>1</sup>Department of Chemistry, University of Arkansas at Little Rock, Little Rock, AR 72204, USA

<sup>2</sup>Department of Electrical and Computer Engineering, University of Texas at Austin, Austin, TX 78712, USA

<sup>3</sup> School of Chemistry & Biochemistry, Georgia Institute of Technology, GA 30332-0400, USA

<sup>4</sup> Department of Chemistry, Louisiana State University, Baton Rouge, LA 70803, USA

\* Correspondence: [nxsiraj@ualr.edu](mailto:nxsiraj@ualr.edu); Tel.: 1-501-569-8829

## Supporting Information

**Table S1.** Concentration and volume of NaFI and nitroaromatics solution in the reaction vials

| No. | NaFI molarity ( $\mu\text{M}$ ) | Volume of NaFI needed from stock solution of 1mM ( $\mu\text{L}$ ) | Nitroaromatics molarity ( $\mu\text{M}$ ) | Volume of nitroaromatic needed from stock solution of 3 mM ( $\mu\text{L}$ ) | Volume of DI water ( $\mu\text{L}$ ) or MeCN ( $\mu\text{L}$ ) |
|-----|---------------------------------|--------------------------------------------------------------------|-------------------------------------------|------------------------------------------------------------------------------|----------------------------------------------------------------|
| 1   | 50                              | 250                                                                | 100                                       | 166.7                                                                        | 4583.3                                                         |
| 2   | 50                              | 250                                                                | 90                                        | 150                                                                          | 4600                                                           |
| 3   | 50                              | 250                                                                | 80                                        | 133.3                                                                        | 4616.7                                                         |
| 4   | 50                              | 250                                                                | 70                                        | 116.7                                                                        | 4633.3                                                         |
| 5   | 50                              | 250                                                                | 60                                        | 100                                                                          | 4650                                                           |
| 6   | 50                              | 250                                                                | 50                                        | 83.3                                                                         | 4666.7                                                         |
| 7   | 50                              | 250                                                                | 40                                        | 66.7                                                                         | 4683.3                                                         |
| 8   | 50                              | 250                                                                | 30                                        | 50                                                                           | 4700                                                           |
| 9   | 50                              | 250                                                                | 20                                        | 33.3                                                                         | 4716.7                                                         |
| 10  | 50                              | 250                                                                | 10                                        | 16.7                                                                         | 4733.3                                                         |
| 11  | 50                              | 250                                                                | 0                                         | 0                                                                            | 4750                                                           |

**Table S2:** Kamlet- Taft Parameters which measures separately the acidity or proticity or Hydrogen bond donating ability ( $\alpha$ ), basicity or hydrogen bond accepting ability ( $\beta$ ) and dipolarity/polarizability ( $\pi^*$ ) properties of solvents [1].

| Solvent    | $\pi^*$ | $\alpha$ | $\beta$ |
|------------|---------|----------|---------|
| Water      | 1.09    | 1.17     | 0.18    |
| MeCN       | 0.75    | 0.19     | 0.31    |
| DMF        | 0.88    | 0.00     | 0.69    |
| THF        | 0.58    | 0.00     | 0.55    |
| Chloroform | 0.58    | 0.00     | 0.44    |

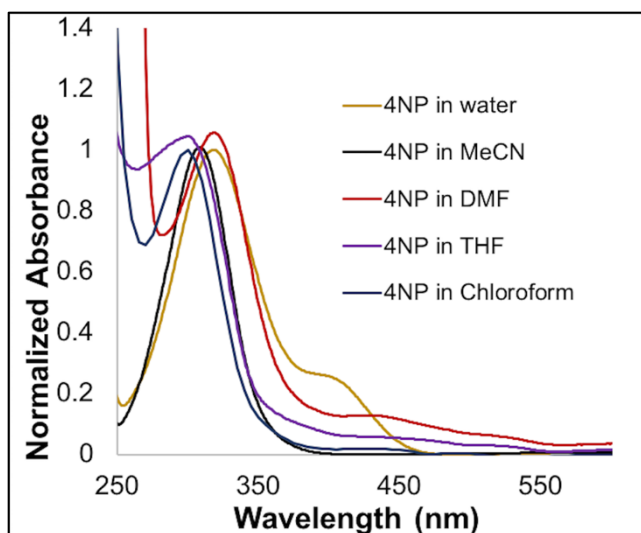

**Figure S1.** Normalized absorption spectra of 4NP in different solvents

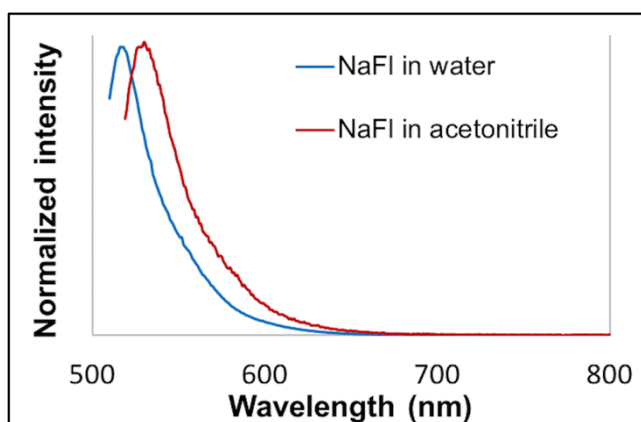

**Figure S2.** Normalized fluorescence emission spectra of NaFl in two different solvents. The fluorescence emission of NaFl was recorded in water and MeCN at an excitation wavelength of 490 nm and 510 nm, respectively.

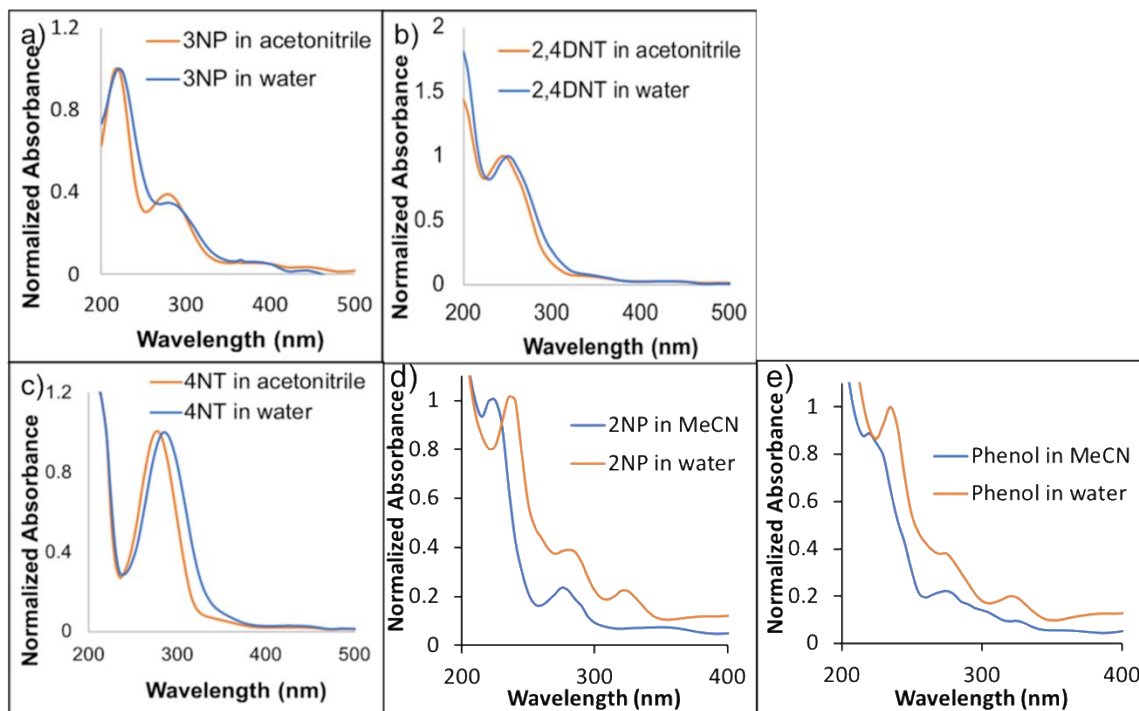

**Figure S3.** Normalized absorption spectra of a) 3NP, b) 2,4DNT, c) 4NT, d) 2NP, and e) phenol in acetonitrile and in water.

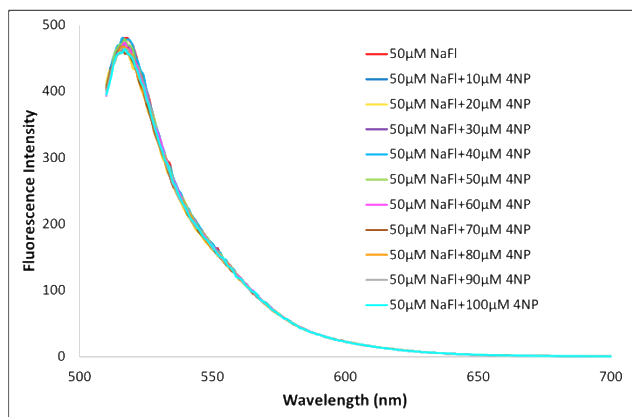

**Figure S4.** Fluorescence emission spectra of NaFl at the excitation wavelength of 490 nm in the presence of 4NP in water.

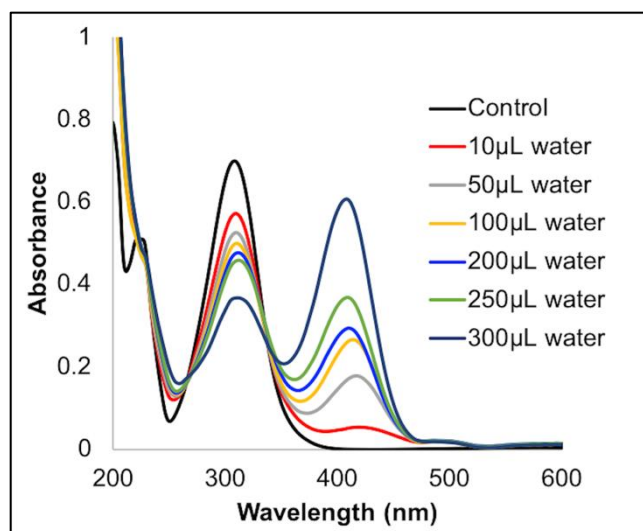

**Figure S5.** Absorption spectra of 4NP in MeCN and upon addition of different volume ( $\mu\text{L}$ ) of water.

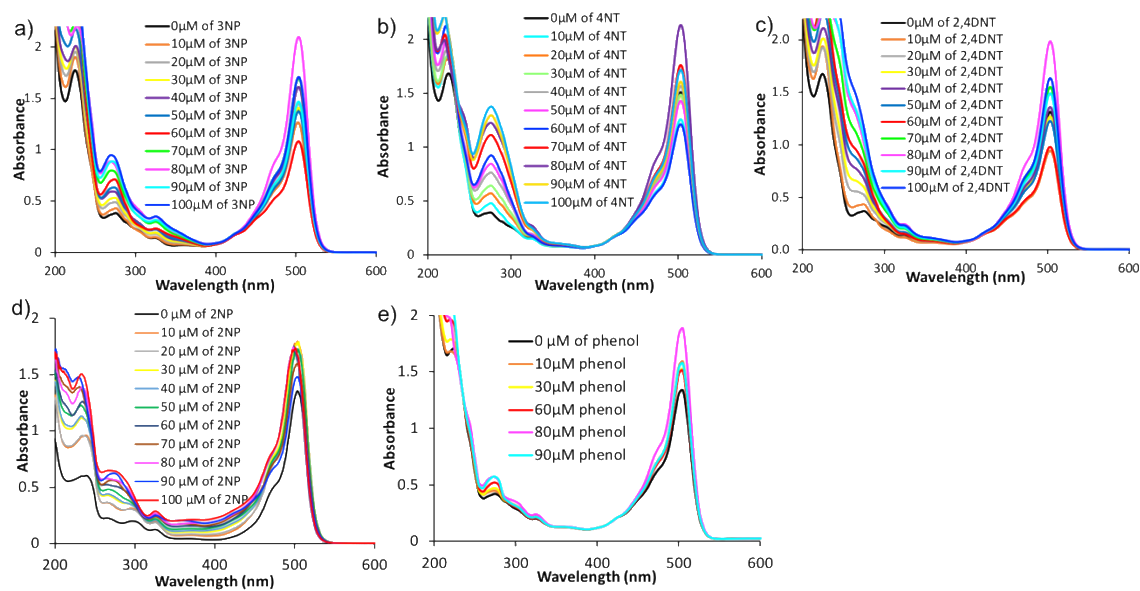

**Figure S6.** Absorption spectra of 50  $\mu\text{M}$  of NaFl in the presence of different concentrations of a) 3NP, b) 4NT, c) 2,4DNT d) 2NP, and e) phenol in MeCN.

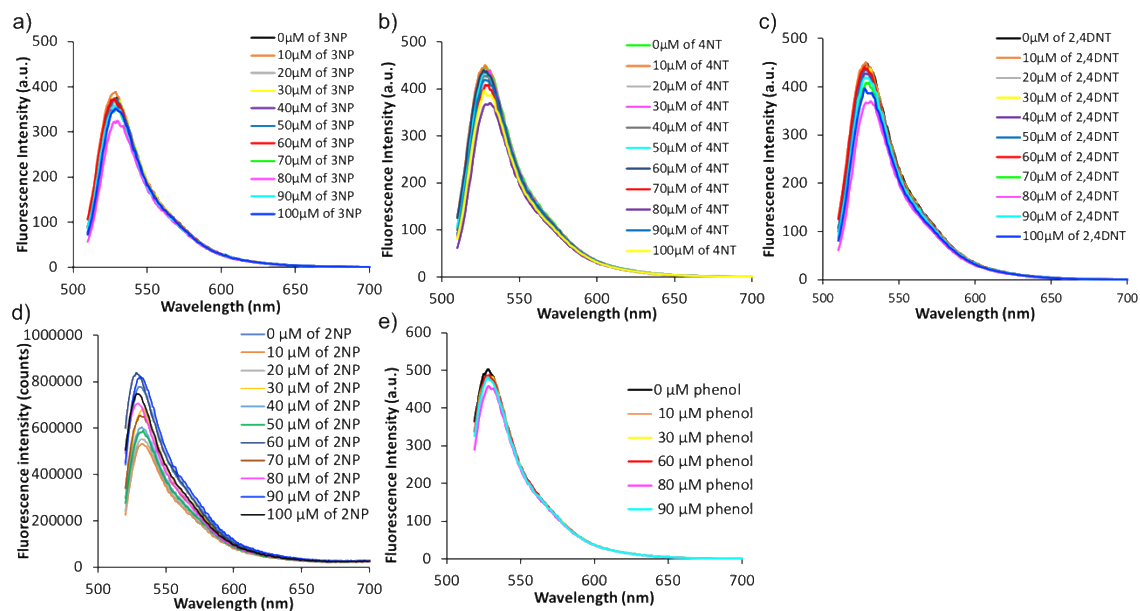

**Figure S7.** Fluorescence emission spectra of 50  $\mu\text{M}$  of NaFI at the excitation wavelength of 510 nm in the presence of different concentrations of a) 3NP, b) 4NT, c) 2,4DNT, d) 2NP, and e) phenol in MeCN.

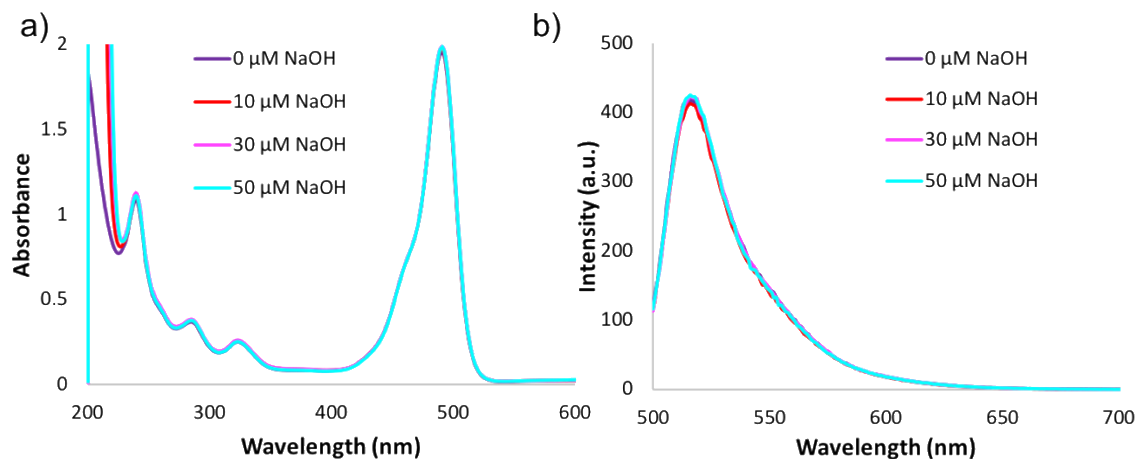

**Figure S8.** a) Absorption and b) fluorescence emission spectra (at excitation wavelength of 490 nm) of 30  $\mu\text{M}$  of NaFI in alkaline media.

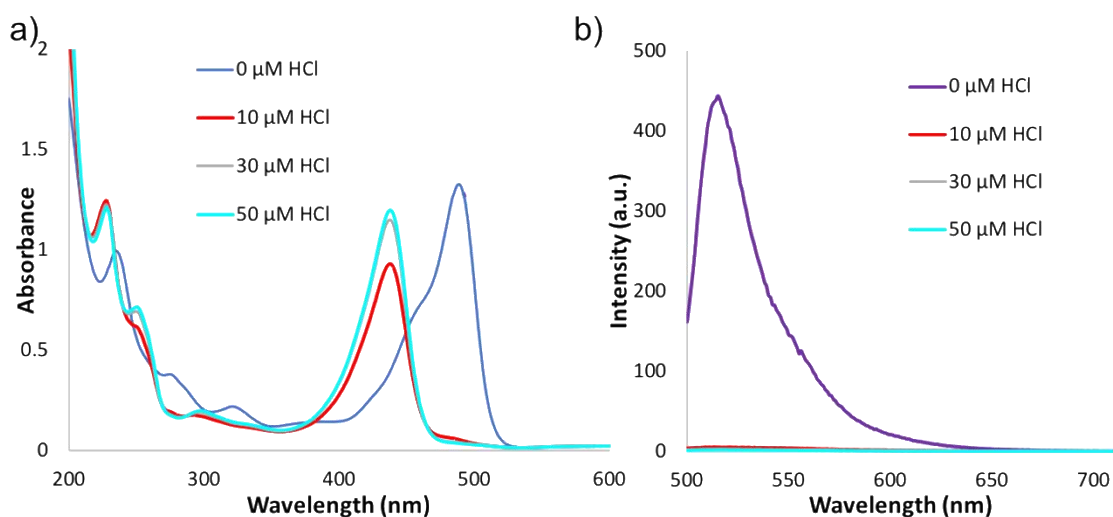

**Figure S9.** a) Absorption and b) fluorescence emission spectra (at an excitation wavelength of 490 nm) of 30  $\mu\text{M}$  of NaFl in acidic media.

**Table S3.** 4NP toxic concentration reported by EPA [2].

|            | <b>Lethal dose, 50% (LD50)</b>                          |
|------------|---------------------------------------------------------|
| Oral       | 230 ppm (for rat)                                       |
| Dermal     | > 5000 mg/Kg ( for rabbit)<br>> 920 mg/Kg ( for mammal) |
| Inhalation | > 4.7 ppm ( for rat in 4 hours)                         |

| <b>Animals and organisms</b> | <b>Toxicity</b>                    |
|------------------------------|------------------------------------|
| Freshwater algae             | EC50= 2.3-7.71 ppm<br>for 96 hours |
| Freshwater fish              | LC50= 6.6 ppm<br>for 96 hours      |
| Water flea                   | EC50= 3.1-7.1 ppm<br>for 48 hours  |

**Table S4.** Detection limit and quenching efficiency of fluorescent sensors to nitroaromatic compounds from previous works as compared to our work.

| Sensors                                                                        | Nitroaromatic compounds | Detection of Limit (mol/L) | Quenching efficiency (%) | References       |
|--------------------------------------------------------------------------------|-------------------------|----------------------------|--------------------------|------------------|
| Pyrimidine-based fluorophores                                                  | 4NP                     | $1.95 \times 10^{-5}$      | < 10                     | [3]              |
| Pyrimidine-based containing carbazole                                          | 4NP                     | $1.65 \times 10^{-4}$      | < 15                     | [4]              |
| 1,4-diazine-based dyes                                                         | 4NP                     | $3.26 \times 10^{-6}$      | ~ 0.3                    | [5]              |
| Gold nanoparticle @sulfur-doped graphene quantum dots (Au NP@S-GQD)            | 4NP                     | $3.5 \times 10^{-9}$       | ---                      | [6]              |
| Bovine serum albumin functionalized fluorescent gold nanoclusters (BSA Au-NCs) | 4NP                     | $1.0 \times 10^{-9}$       | ~ 85                     | [7]              |
| CdTe quantum dots                                                              | 4NP                     | $4.0 \times 10^{-8}$       | ---                      | [8]              |
| Molecular imprinted polymers based on carbon dots (MIP C-dots)                 | 4NP                     | $6.0 \times 10^{-8}$       | ---                      | [9]              |
| <b>Sodium fluorescein in MeCN</b>                                              | 4NP                     | $2.07 \times 10^{-6}$      | ~ 98                     | <b>This work</b> |



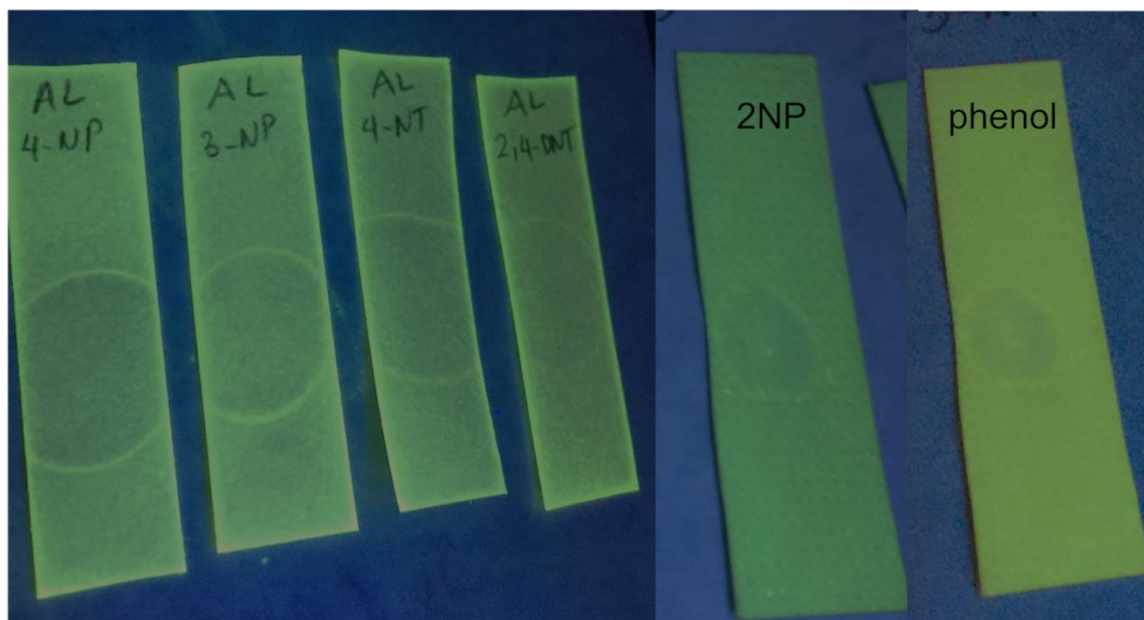

**Figure S10.** Filter paper based NaFI sensor for nitroaromatic detection.

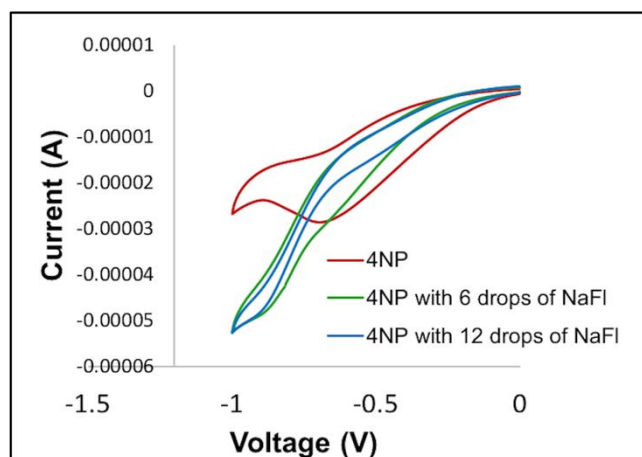

**Figure S11.** Cyclic voltammogram of 4NP in the presence of NaFI

## References

1. J. Kamlet, M.; Luis M. Abboud, J.; H. Abraham, M.; W. Taft, R. Linear solvation energy relationships. 23. A comprehensive collection of the solvatochromic parameters,  $\pi^*$ ,  $\alpha$ , and  $\beta$ , and some methods for simplifying the generalized solvatochromic equation. *J. Org. Chem.* **1983**, *48*, 2877–2887, doi:10.1021/jo00165a018.
2. Agency for Toxic Substances and Disease Toxicological Profile for Nitrophenols: 2-Nitrophenol 4-Nitrophenol. *U.S. Dep. Heal. Hum. Serv. Public Heal. Serv. Atlanta, GA* **1992**.
3. Verbitskiy, E. V.; Dinastiya, E.M.; Baranova, A.A.; Khokhlov, K.O.; Chuvashov, R.D.; Yakovleva, Y.A.; Makarova, N.I.; Vetrova, E. V.; Metelitsa, A. V.; Slepukhin, P.A.; et al. New V-shaped 2,4-di(hetero)arylpyrimidine push-pull systems: Synthesis, solvatochromism and sensitivity towards nitroaromatic compounds. *Dye. Pigment.* **2018**, *159*, 35–44, doi:10.1016/j.dyepig.2018.05.075.
4. Verbitskiy, E. V.; Baranova, A.A.; Khokhlov, K.O.; Yakovleva, Y.A.; Chuvashov, R.D.; Kim, G.A.; Moiseykin, E. V.; Dinastiya, E.M.; Rusinov, G.L.; Chupakhin, O.N.; et al. New push–pull system based on 4,5,6-tri(het)arylpyrimidine containing carbazole substituents: synthesis and sensitivity toward nitroaromatic compounds. *Chem. Heterocycl. Compd.* **2018**, *54*, 604–611, doi:10.1007/s10593-018-2315-x.
5. Verbitskiy, E. V.; Kvashnin, Y.A.; Baranova, A.A.; Khokhlov, K.O.; Chuvashov, R.D.; Schapov, I.E.; Yakovleva, Y.A.; Zhilina, E.F.; Shchepochkin, A. V.; Makarova, N.I.; et al. Synthesis and characterization of linear 1,4-diazine-triphenylamine–based selective chemosensors for recognition of nitroaromatic compounds and aliphatic amines. *Dye. Pigment.* **2020**, *178*, 1–10, doi:10.1016/j.dyepig.2020.108344.
6. Anh, N.T.N.; Doong, R.A. One-Step Synthesis of Size-Tunable Gold@Sulfur-Doped Graphene Quantum Dot Nanocomposites for Highly Selective and Sensitive Detection of Nanomolar 4-Nitrophenol in Aqueous Solutions with Complex Matrix. *ACS Appl. Nano Mater.* **2018**, *1*, 2153–2163, doi:10.1021/acsanm.8b00210.
7. Yang, X.; Wang, J.; Su, D.; Xia, Q.; Chai, F.; Wang, C.; Qu, F. Fluorescent detection of TNT and 4-nitrophenol by BSA Au nanoclusters. *Dalt. Trans.* **2014**, *43*, 10057–10063, doi:10.1039/c4dt00490f.
8. Jiang, L.; Liu, H.; Li, M.; Xing, Y.; Ren, X. Surface molecular imprinting on CdTe quantum dots for fluorescence sensing of 4-nitrophenol. *Anal. Methods* **2016**, *8*, 2226–2232, doi:10.1039/c5ay03160e.
9. Hao, T.; Wei, X.; Nie, Y.; Xu, Y.; Yan, Y.; Zhou, Z. An eco-friendly molecularly imprinted fluorescence composite material based on carbon dots for fluorescent detection of 4-nitrophenol. *Microchim. Acta* **2016**, *183*, 2197–2203, doi:10.1007/s00604-016-1851-2.
